# Supplementary material for: Structural and Spectroscopic Effects of Li+ Substitution for Na+ in LixNa1-xCaGd0.5Ho0.05Yb0.45(MoO4)3 Scheelite-Type Upconversion Phosphors
Source: MDPI journal article supplement (doi:10.3390/molecules26237357), 2021-12-03
Supplement: s1 [file s1]

## Supporting Information

### Structural and spectroscopic effects of $\text{Li}^+$ substitution for $\text{Na}^+$ in $\text{Li}_x\text{Na}_{1-x}$

### $_{x}\text{CaGd}_{0.5}\text{Ho}_{0.05}\text{Yb}_{0.45}(\text{MoO}_4)_3$ scheelite-type upconversion phosphors

Chang Sung Lim <sup>1,\*,\dagger</sup>, Aleksandr Aleksandrovsky <sup>2,3</sup>, Maxim Molokeev <sup>4,5,6</sup>, Aleksandr Oreshonkov

<sup>7,8</sup> and Victor Atuchin <sup>9,10,11,\*,\dagger</sup>

<sup>1</sup>Department of Aerospace Advanced Materials and Chemical Engineering, Hanseo University,

Seosan 31962, Korea

<sup>2</sup>Laboratory of Coherent Optics, Kirensky Institute of Physics Federal Research Center KSC SB RAS,

Krasnoyarsk 660036, Russia

<sup>3</sup>Institute of Nanotechnology, Spectroscopy and Quantum Chemistry, Siberian Federal University,

Krasnoyarsk 660041, Russia

<sup>4</sup>Laboratory of Crystal Physics, Kirensky Institute of Physics, Federal Research Center KSC SB RAS,

Krasnoyarsk 660036, Russia

<sup>5</sup>Institute of Engineering Physics and Radioelectronics, Siberian Federal University, Krasnoyarsk

660041, Russia [krasn.ru](http://krasn.ru)

<sup>6</sup>Department of Physics, Far Eastern State Transport University, Khabarovsk 680021, Russia

<sup>7</sup>Laboratory of Molecular Spectroscopy, Kirensky Institute of Physics, Federal Research Center KSC

SB RAS, Krasnoyarsk 660036, Russia

<sup>8</sup>School of Engineering and Construction, Siberian Federal University, Krasnoyarsk 660041, Russia

<sup>9</sup>Laboratory of Optical Materials and Structures, Institute of Semiconductor Physics, SB RAS,

Novosibirsk 630090, Russia

<sup>10</sup>Research and Development Department, Kemerovo State University, Kemerovo 650000, Russia

<sup>11</sup>Department of Industrial Machinery Design, Novosibirsk State Technical University, Novosibirsk

630073, Russia

\*Correspondence: cslim@hanseo.ac.kr (C.S.L.); atuchin@isp.nsc.ru (V.V.A.)

<sup>†</sup>Hanseon University, Seosan 31962, Korea

<sup>††</sup>Institute of Semiconductor Physics, SB RAS, Novosibirsk 630090, Russia

**Table S1.** Fractional atomic coordinates and isotropic displacement parameters ( $\text{\AA}^2$ ) of LiNCGM:HY samples

| Atom                                                                                                          | $x$         | $y$         | $z$        | $B_{\text{iso}}$ | Occ.   |
|---------------------------------------------------------------------------------------------------------------|-------------|-------------|------------|------------------|--------|
| Na <sub>1/3</sub> Ca <sub>1/3</sub> Gd <sub>1/6</sub> MoO <sub>4</sub> :0.05Ho,0.45Yb                         |             |             |            |                  |        |
| Na                                                                                                            | 0           | 0.25        | 0.625      | 1.89 (19)        | 1/3    |
| Ca                                                                                                            | 0           | 0.25        | 0.625      | 1.89 (19)        | 1/3    |
| Gd                                                                                                            | 0           | 0.25        | 0.625      | 1.89 (19)        | 1/6    |
| Ho                                                                                                            | 0           | 0.25        | 0.625      | 1.89 (19)        | 1/6    |
| Yb                                                                                                            | 0           | 0.25        | 0.625      | 1.89 (19)        | 0.15   |
| Mo                                                                                                            | 0           | 0.25        | 0.125      | 1.64 (19)        | 1      |
| O                                                                                                             | 0.222 (2)   | 0.1182 (15) | 0.0338 (7) | 2.4 (3)          | 1      |
| Na <sub>0.95/3</sub> Li <sub>0.05/3</sub> Ca <sub>1/3</sub> Gd <sub>1/6</sub> MoO <sub>4</sub> :0.05Ho,0.45Yb |             |             |            |                  |        |
| Na                                                                                                            | 0           | 0.25        | 0.625      | 0.49 (19)        | 0.95/3 |
| Li                                                                                                            | 0           | 0.25        | 0.625      | 0.49 (19)        | 0.05/3 |
| Ca                                                                                                            | 0           | 0.25        | 0.625      | 0.49 (19)        | 1/3    |
| Gd                                                                                                            | 0           | 0.25        | 0.625      | 0.49 (19)        | 1/6    |
| Ho                                                                                                            | 0           | 0.25        | 0.625      | 0.49 (19)        | 1/60   |
| Yb                                                                                                            | 0           | 0.25        | 0.625      | 0.49 (19)        | 0.15   |
| Mo                                                                                                            | 0           | 0.25        | 0.125      | 0.64 (18)        | 1      |
| O                                                                                                             | 0.242 (2)   | 0.1003 (14) | 0.0389 (6) | 0.6 (3)          | 1      |
| Na <sub>0.9/3</sub> Li <sub>0.1/3</sub> Ca <sub>1/3</sub> Gd <sub>1/6</sub> MoO <sub>4</sub> :0.05Ho,0.45Yb   |             |             |            |                  |        |
| Na                                                                                                            | 0           | 0.25        | 0.625      | 0.32 (17)        | 0.9/3  |
| Li                                                                                                            | 0           | 0.25        | 0.625      | 0.32 (17)        | 0.1/3  |
| Ca                                                                                                            | 0           | 0.25        | 0.625      | 0.32 (17)        | 1/3    |
| Gd                                                                                                            | 0           | 0.25        | 0.625      | 0.32 (17)        | 1/6    |
| Ho                                                                                                            | 0           | 0.25        | 0.625      | 0.32 (17)        | 1/60   |
| Yb                                                                                                            | 0           | 0.25        | 0.625      | 0.32 (17)        | 0.15   |
| Mo                                                                                                            | 0           | 0.25        | 0.125      | 0.50 (17)        | 1      |
| O                                                                                                             | 0.2404 (18) | 0.1030 (11) | 0.0401 (5) | 0.5 (3)          | 1      |
| Na <sub>0.8/3</sub> Li <sub>0.2/3</sub> Ca <sub>1/3</sub> Gd <sub>1/6</sub> MoO <sub>4</sub> :0.05Ho,0.45Yb   |             |             |            |                  |        |
| Na                                                                                                            | 0           | 0.25        | 0.625      | 0.72 (15)        | 0.8/3  |
| Li                                                                                                            | 0           | 0.25        | 0.625      | 0.72 (15)        | 0.2/3  |
| Ca                                                                                                            | 0           | 0.25        | 0.625      | 0.72 (15)        | 1/3    |
| Gd                                                                                                            | 0           | 0.25        | 0.625      | 0.72 (15)        | 1/6    |
| Ho                                                                                                            | 0           | 0.25        | 0.625      | 0.72 (15)        | 1/60   |
| Yb                                                                                                            | 0           | 0.25        | 0.625      | 0.72 (15)        | 0.15   |
| Mo                                                                                                            | 0           | 0.25        | 0.125      | 0.69 (14)        | 1      |

|                                                                                                             |             |             |            |           |       |
|-------------------------------------------------------------------------------------------------------------|-------------|-------------|------------|-----------|-------|
| O                                                                                                           | 0.2472 (19) | 0.1028 (12) | 0.0392 (5) | 1.1 (2)   | 1     |
| Na <sub>0.7/3</sub> Li <sub>0.3/3</sub> Ca <sub>1/3</sub> Gd <sub>1/6</sub> MoO <sub>4</sub> :0.05Ho,0.45Yb |             |             |            |           |       |
| Na                                                                                                          | 0           | 0.25        | 0.625      | 1.03 (14) | 0.7/3 |
| Li                                                                                                          | 0           | 0.25        | 0.625      | 1.03 (14) | 0.3/3 |
| Ca                                                                                                          | 0           | 0.25        | 0.625      | 1.03 (14) | 1/3   |
| Gd                                                                                                          | 0           | 0.25        | 0.625      | 1.03 (14) | 1/6   |
| Ho                                                                                                          | 0           | 0.25        | 0.625      | 1.03 (14) | 1/60  |
| Yb                                                                                                          | 0           | 0.25        | 0.625      | 1.03 (14) | 0.15  |
| Mo                                                                                                          | 0           | 0.25        | 0.125      | 1.08 (14) | 1     |
| O                                                                                                           | 0.2406 (18) | 0.1065 (11) | 0.0418 (5) | 1.3 (2)   | 1     |

**Table S2.** Main bond lengths (Å) of LiNCGM:HY samples

|                                                                                                               |            |      |            |
|---------------------------------------------------------------------------------------------------------------|------------|------|------------|
| Na <sub>1/3</sub> Ca <sub>1/3</sub> Gd <sub>1/6</sub> MoO <sub>4</sub> :0.05Ho,0.45Yb                         |            |      |            |
| (Na/Ca/Gd/Ho/Yb)—O <sup>i</sup>                                                                               | 2.616 (10) | Mo—O | 1.699 (10) |
| (Na/Ca/Gd/Ho/Yb)—O <sup>ii</sup>                                                                              | 2.413 (9)  |      |            |
| Na <sub>0.95/3</sub> Li <sub>0.05/3</sub> Ca <sub>1/3</sub> Gd <sub>1/6</sub> MoO <sub>4</sub> :0.05Ho,0.45Yb |            |      |            |
| (Na/Li/Ca/Gd/Ho/Yb)—O <sup>i</sup>                                                                            | 2.467 (10) | Mo—O | 1.776 (9)  |
| (Na/Li/Ca/Gd/Ho/Yb)—O <sup>ii</sup>                                                                           | 2.425 (8)  |      |            |
| Na <sub>0.9/3</sub> Li <sub>0.1/3</sub> Ca <sub>1/3</sub> Gd <sub>1/6</sub> MoO <sub>4</sub> :0.05Ho,0.45Yb   |            |      |            |
| (Na/Li/Ca/Gd/Ho/Yb)—O <sup>i</sup>                                                                            | 2.477 (8)  | Mo—O | 1.756 (8)  |
| (Na/Li/Ca/Gd/Ho/Yb)—O <sup>ii</sup>                                                                           | 2.436 (7)  |      |            |
| Na <sub>0.8/3</sub> Li <sub>0.2/3</sub> Ca <sub>1/3</sub> Gd <sub>1/6</sub> MoO <sub>4</sub> :0.05Ho,0.45Yb   |            |      |            |
| (Na/Li/Ca/Gd/Ho/Yb)—O <sup>i</sup>                                                                            | 2.459 (8)  | Mo—O | 1.786 (8)  |
| (Na/Li/Ca/Gd/Ho/Yb)—O <sup>ii</sup>                                                                           | 2.406 (7)  |      |            |
| Na <sub>0.7/3</sub> Li <sub>0.3/3</sub> Ca <sub>1/3</sub> Gd <sub>1/6</sub> MoO <sub>4</sub> :0.05Ho,0.45Yb   |            |      |            |
| (Na/Li/Ca/Gd/Ho/Yb)—O <sup>i</sup>                                                                            | 2.479 (8)  | Mo—O | 1.735 (8)  |
| (Na/Li/Ca/Gd/Ho/Yb)—O <sup>ii</sup>                                                                           | 2.440 (7)  |      |            |

Symmetry codes: (i) -x+1/2, -y, z+1/2; (ii) -x+1/2, -y+1/2, -z+1/2.

**Table S3.** Main parameters of processing and refinement of the NaCaGd(MoO<sub>4</sub>)<sub>3</sub>:xEr,yYb samples [64]

| $x, y$                          | 0, 0         | 0.2, 0       | 0.1, 0.2     | 0.05, 0.45   |
|---------------------------------|--------------|--------------|--------------|--------------|
| Sp.Gr.                          | $I4_1/a$     | $I4_1/a$     | $I4_1/a$     | $I4_1/a$     |
| $a, \text{\AA}$                 | 5.22881 (14) | 5.22313 (11) | 5.21690 (13) | 5.20680 (13) |
| $c, \text{\AA}$                 | 11.4228 (3)  | 11.4095 (3)  | 11.3911 (3)  | 11.3635 (4)  |
| $V, \text{\AA}^3$               | 312.304 (18) | 311.263 (15) | 310.02 (2)   | 308.08 (2)   |
| $Z$                             | 4            | 4            | 4            | 4            |
| $2\theta$ -interval,<br>°       | 10-90        | 10-90        | 10-90        | 10-90        |
| No. of<br>reflections           | 67           | 67           | 67           | 67           |
| No. of<br>refined<br>parameters | 7            | 7            | 7            | 7            |
| $R_{wp}, \%$                    | 17.88        | 18.175       | 16.89        | 16.05        |
| $R_p, \%$                       | 11.67        | 12.62        | 11.26        | 10.76        |
| $R_{exp}, \%$                   | 15.97        | 15.84        | 15.15        | 14.00        |
| $\chi^2$                        | 1.12         | 1.15         | 1.11         | 1.15         |
| $R_B, \%$                       | 3.15         | 2.89         | 2.37         | 2.43         |

**Table S4.** Main parameters of processing and refinement of the NaCaGd(MoO<sub>4</sub>)<sub>3</sub>:xHo,yYb samples [65]

| $x, y$                          | 0, 0         | 0.05, 0.35  | 0.05, 0.40   | 0.05, 0.45   | 0.05, 0.50    |
|---------------------------------|--------------|-------------|--------------|--------------|---------------|
| Sp.Gr.                          | $I4_1/a$     | $I4_1/a$    | $I4_1/a$     | $I4_1/a$     | $I4_1/a$      |
| $a, \text{\AA}$                 | 5.2287 (1)   | 5.2125 (2)  | 5.20938 (19) | 5.20933 (11) | 5.20550 (11)  |
| $c, \text{\AA}$                 | 11.4226 (2)  | 11.3799 (5) | 11.3720 (4)  | 11.3666 (3)  | 11.3613 (3)   |
| $V, \text{\AA}^3$               | 312.291 (13) | 309.20 (3)  | 308.61 (3)   | 308.457 (16) | 307.859 (16)) |
| $Z$                             | 4            | 4           | 4            | 4            | 4             |
| $2\theta$ -interval,<br>°       | 10-90        | 10-90       | 10-90        | 10-90        | 10-90         |
| No. of<br>reflections           | 67           | 67          | 67           | 67           | 67            |
| No. of<br>refined<br>parameters | 7            | 7           | 7            | 7            | 7             |
| $R_{wp}, \%$                    | 18.49        | 18.14       | 15.91        | 15.07        | 14.88         |
| $R_p, \%$                       | 12.62        | 12.91       | 10.84        | 10.63        | 10.16         |
| $R_{exp}, \%$                   | 15.96        | 14.19       | 13.99        | 13.38        | 13.13         |
| $\chi^2$                        | 1.16         | 1.28        | 1.14         | 1.13         | 1.13          |
| $R_B, \%$                       | 3.20         | 2.59        | 2.18         | 1.61         | 2.07          |

**Table S5.** Main parameters of processing and refinement of the  $\text{Li}_x\text{Na}_{1-x}\text{CaLa}(\text{MoO}_4)_3:0.05\text{Ho},0.45\text{Yb}$  samples [66]

| $x$                             | 0           | 0.05         | 0.1          | 0.2         | 0.3         |
|---------------------------------|-------------|--------------|--------------|-------------|-------------|
| Sp.Gr.                          | $I4_1/a$    | $I4_1/a$     | $I4_1/a$     | $I4_1/a$    | $I4_1/a$    |
| $a$ , Å                         | 5.2451 (3)  | 5.24541 (14) | 5.24314 (17) | 5.2447 (2)  | 5.2404 (3)  |
| $c$ , Å                         | 11.4741 (7) | 11.4743 (4)  | 11.4656 (5)  | 11.4729 (5) | 11.4682 (8) |
| $V$ , Å <sup>3</sup>            | 315.67 (4)  | 315.71 (2)   | 315.20 (2)   | 315.58 (3)  | 314.93 (4)  |
| $Z$                             | 4           | 4            | 4            | 4           | 4           |
| $2\theta$ -interval,<br>°       | 10-90       | 10-90        | 10-90        | 10-90       | 10-90       |
| No. of<br>reflections           | 67          | 67           | 67           | 67          | 67          |
| No. of<br>refined<br>parameters | 7           | 7            | 7            | 7           | 7           |
| $R_{wp}$ , %                    | 15.87       | 17.45        | 17.43        | 19.64       | 16.96       |
| $R_p$ , %                       | 10.88       | 12.52        | 12.13        | 13.44       | 11.89       |
| $R_{exp}$ , %                   | 13.43       | 14.47        | 15.17        | 14.73       | 15.06       |
| $\chi^2$                        | 1.18        | 1.21         | 1.15         | 1.33        | 1.13        |
| $R_B$ , %                       | 2.50        | 4.40         | 2.91         | 4.13        | 3.03        |

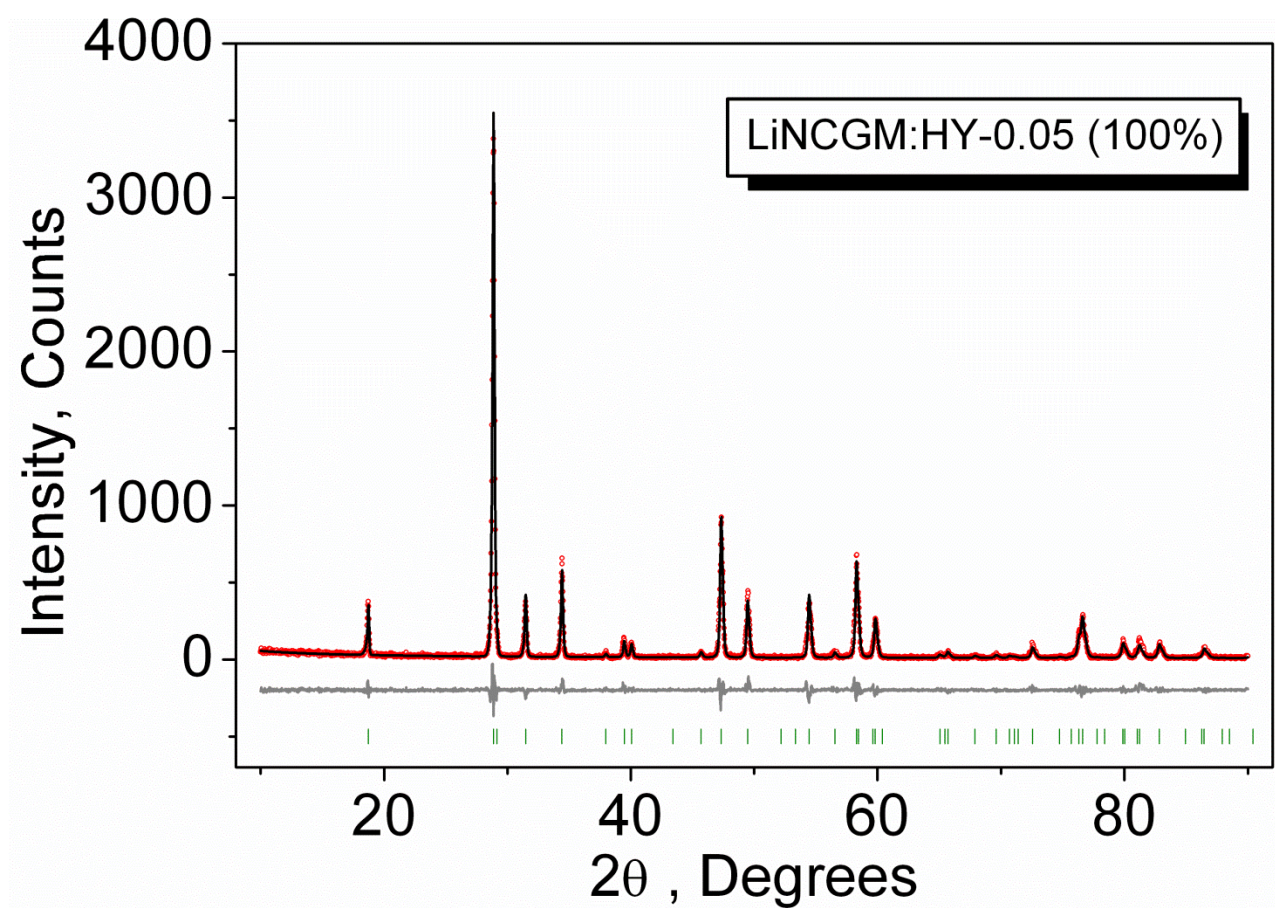

**Figure S1.** Difference Rietveld plots of LiNCGM:HY-0.05.

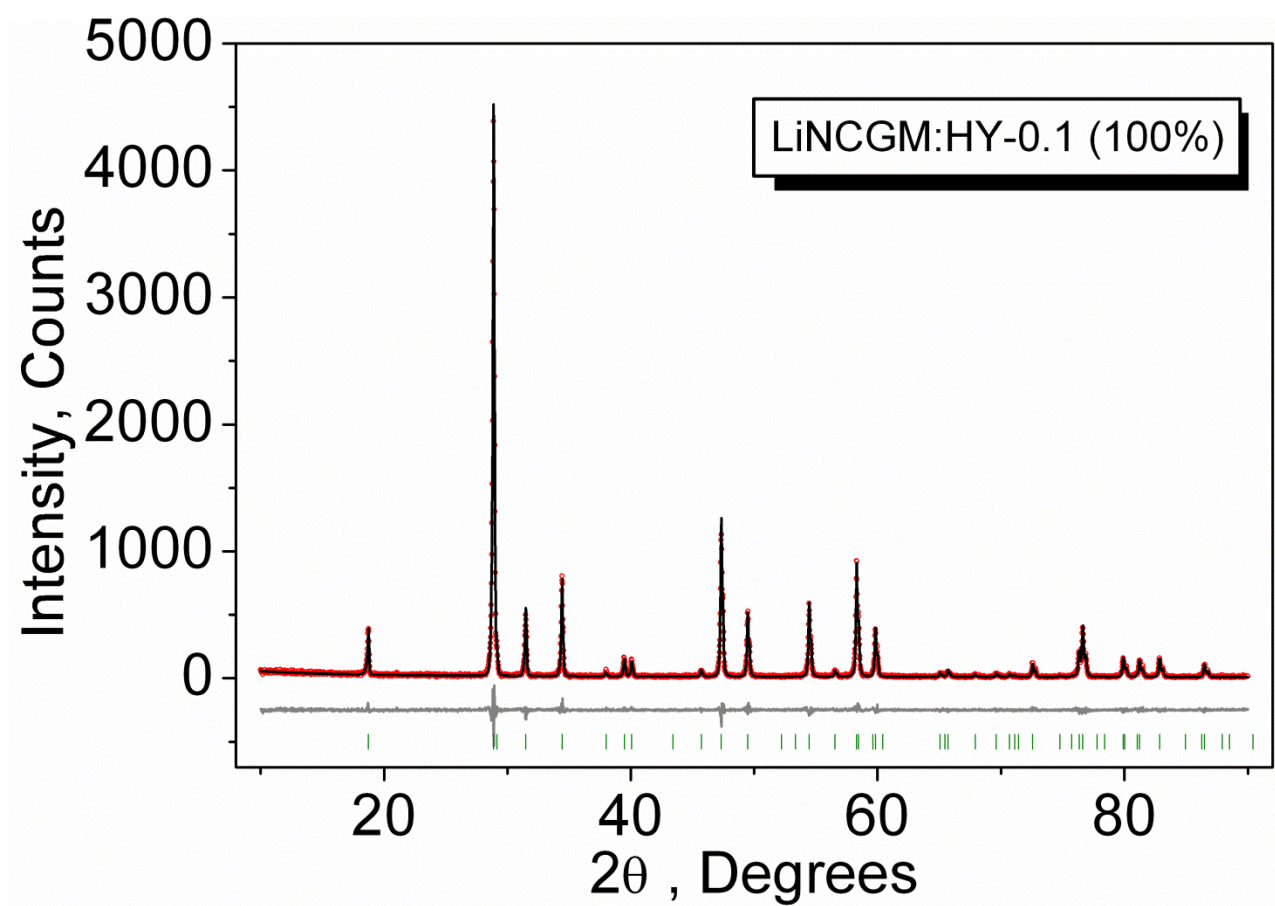

**Figure S2.** Difference Rietveld plots of LiNCGM:HY-0.1.



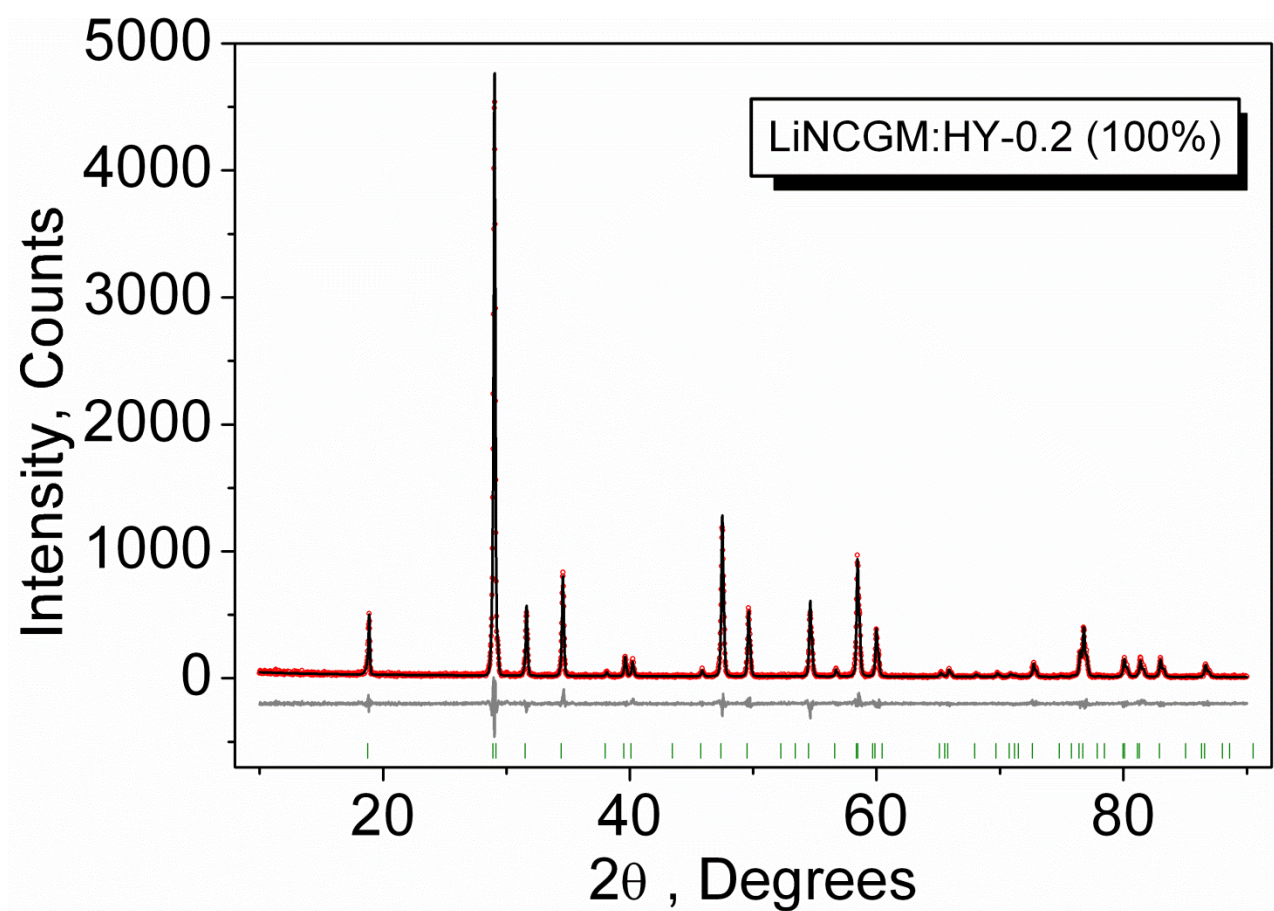

**Figure S3.** Difference Rietveld plots of LiNCGM:HY-0.2.

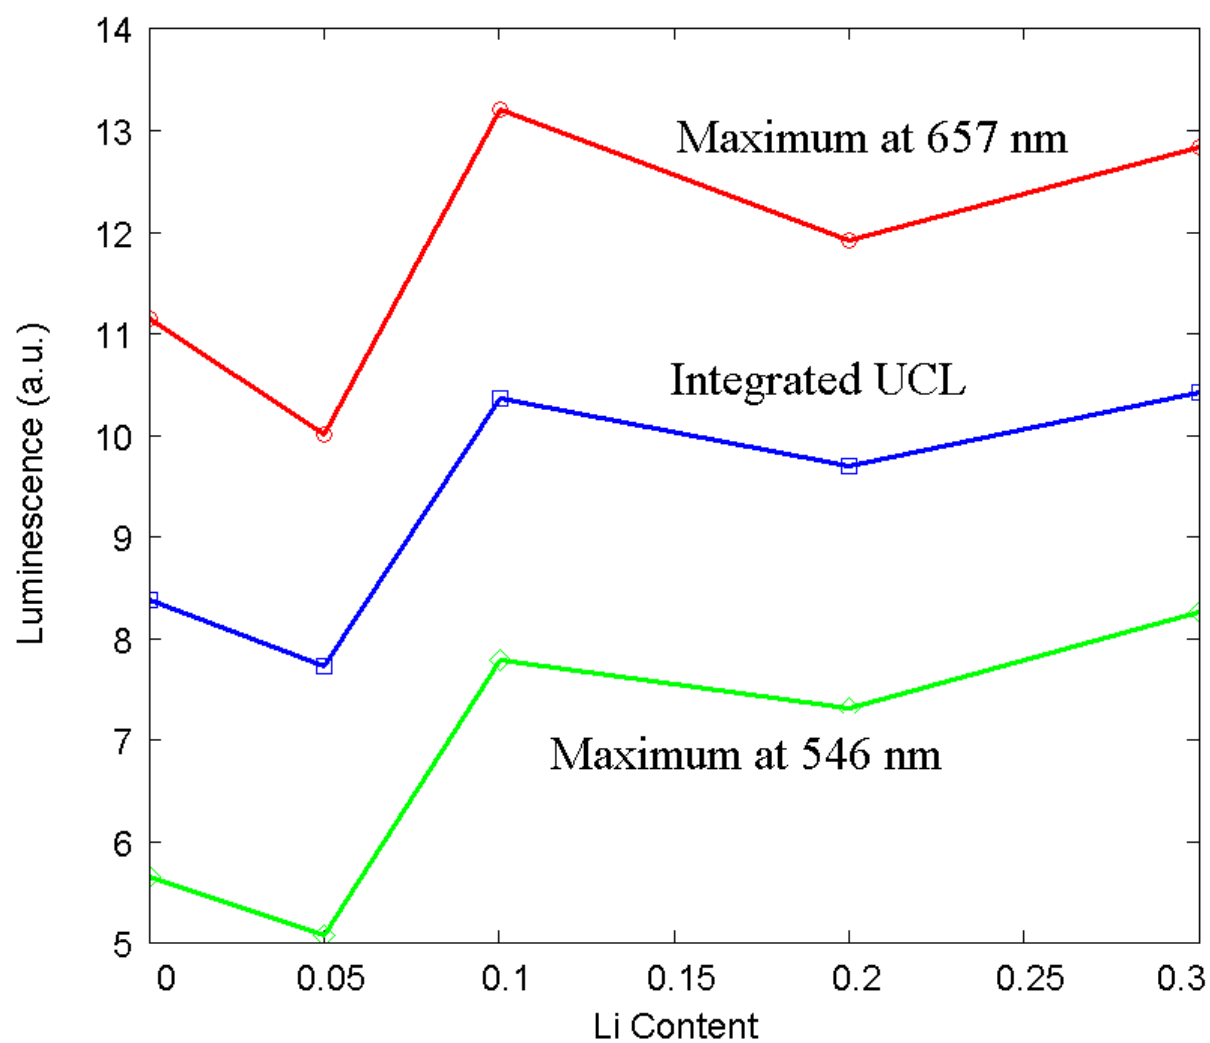

**Figure S4.** Variations of integral intensity and intensity of specific UC bands upon Li content.
